# Supplementary material for: Topographic confinement of epithelial clusters induces epithelial-to-mesenchymal transition in compliant matrices
Source: PubMed Central journal article supplement (PMC4700414; doi:10.1038/srep18831), 2016-01-05
Supplement: srep18831-s1.pdf [file srep18831-s1.pdf]

# SUPPLEMENTARY INFORMATION

for

## “Topographic confinement of epithelial clusters induces epithelial-to-mesenchymal transition in compliant matrices”

Samila Nasrollahi and Amit Pathak\*

*Department of Mechanical Engineering and Materials Science, Washington University, Saint Louis, MO 63130, USA*

*\*Corresponding Author*

### Supplementary Figures

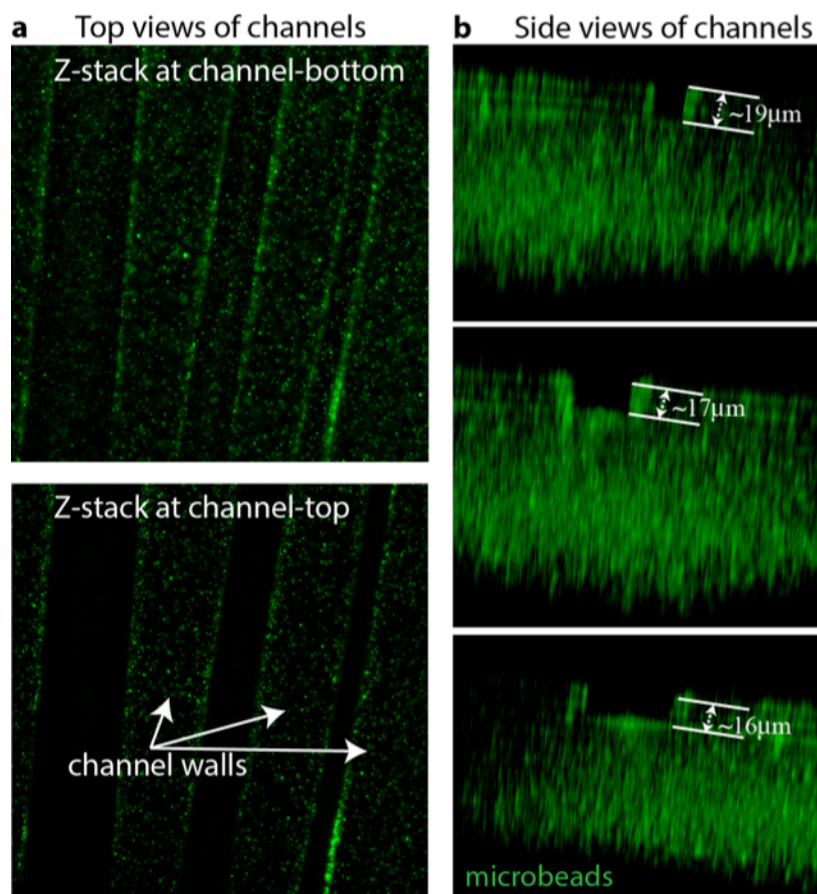

**Supplementary Figure 1: Estimation of channel height.** (a) Confocal images of fluorescent micro-beads (green) embedded in PA gels showing Z-stacks at the top and the bottom surfaces of the channels. (b) Visualizing channel height through lateral views of channels, obtained by 3D volume reconstruction of the confocal Z-stack images of fluorescent micro-beads embedded in PA gels.

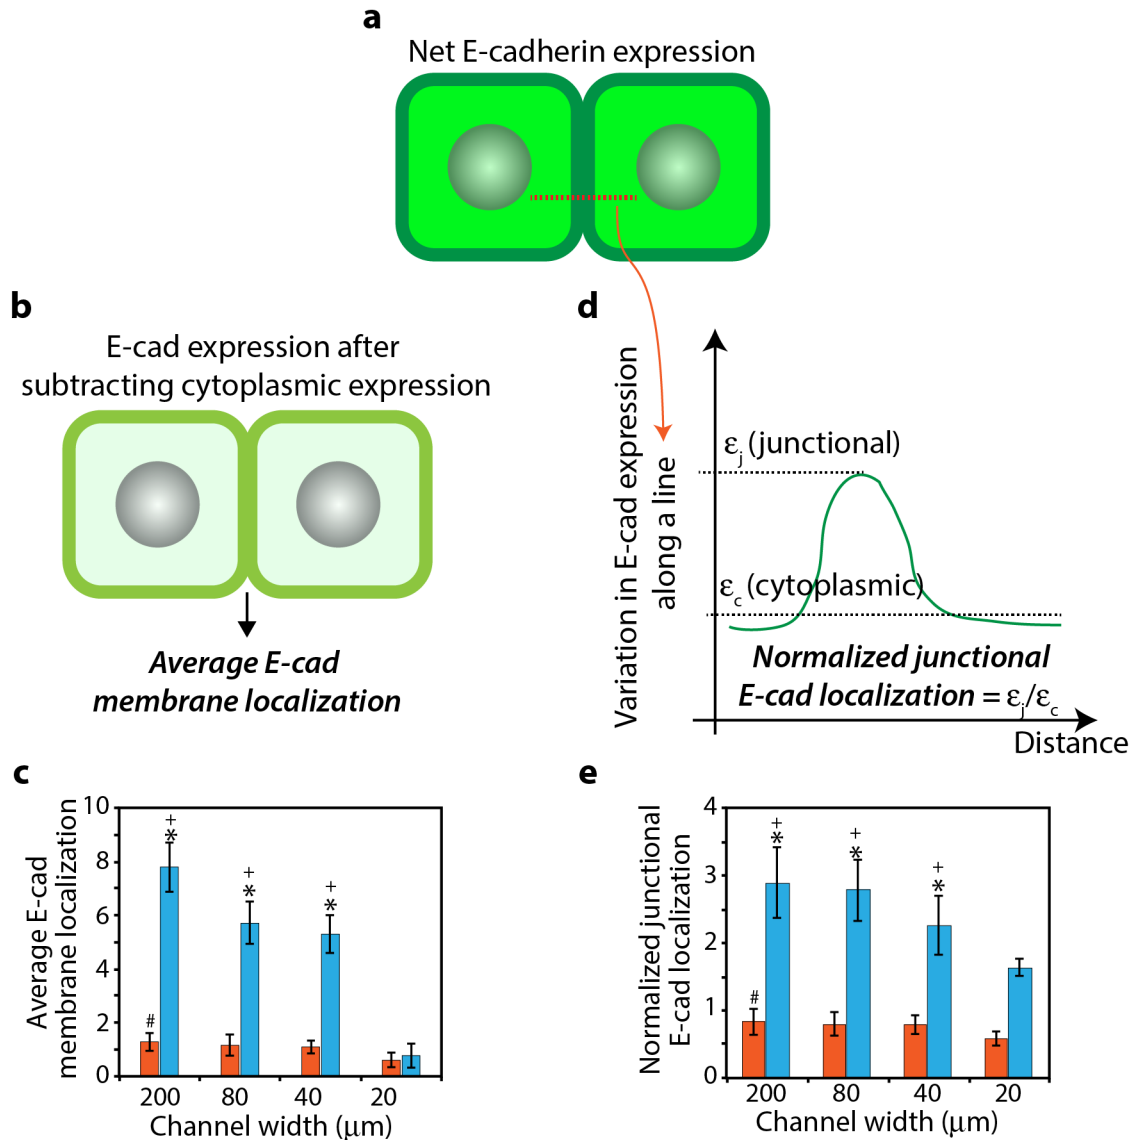

**Supplementary Figure 2: Comparison of two methods for quantifying E-cad localization.** (a) Schematic describing a typical image of E-cad expression in both the cytoplasm and at intercellular membrane junctions. (b) Schematic describing E-cad junctional expression obtained after subtracting the cytoplasmic E-cad expression. (c) Average E-cad membrane localization calculated by summing pixel intensity in the subtracted image and normalizing by cell density, for channels of varying width and stiffness.  $N > 8$  clusters of numerous cells, from at least three separate experiments (see details in Methods). (d) Schematic describing a second method of quantifying E-cad junctional localization in which the E-cad expression along a line drawn between two cells varies such that it reaches a peak value at the intercellular boundary. Here, normalized E-cad junctional localization is computed as the ratio of the junctional E-cad expression,  $\epsilon_j$ , and the cytoplasmic E-cad expression,  $\epsilon_c$ . (e) Normalized E-cad junctional localization ( $\epsilon_j/\epsilon_c$ ) calculated by drawing lines between cells inside channels of varying width and stiffness.  $N > 15$  pairs of cells per condition, from at least three separate experiments. The general agreement of trends in (c) and (e) demonstrates that the two methods are equivalent. \*  $p < 0.05$  with respect to stiff ECM. +  $p < 0.05$  with respect to narrow (20 μm) channels for 1 kPa stiffness. #  $p < 0.05$  with respect to narrow channels for 120 kPa stiffness.

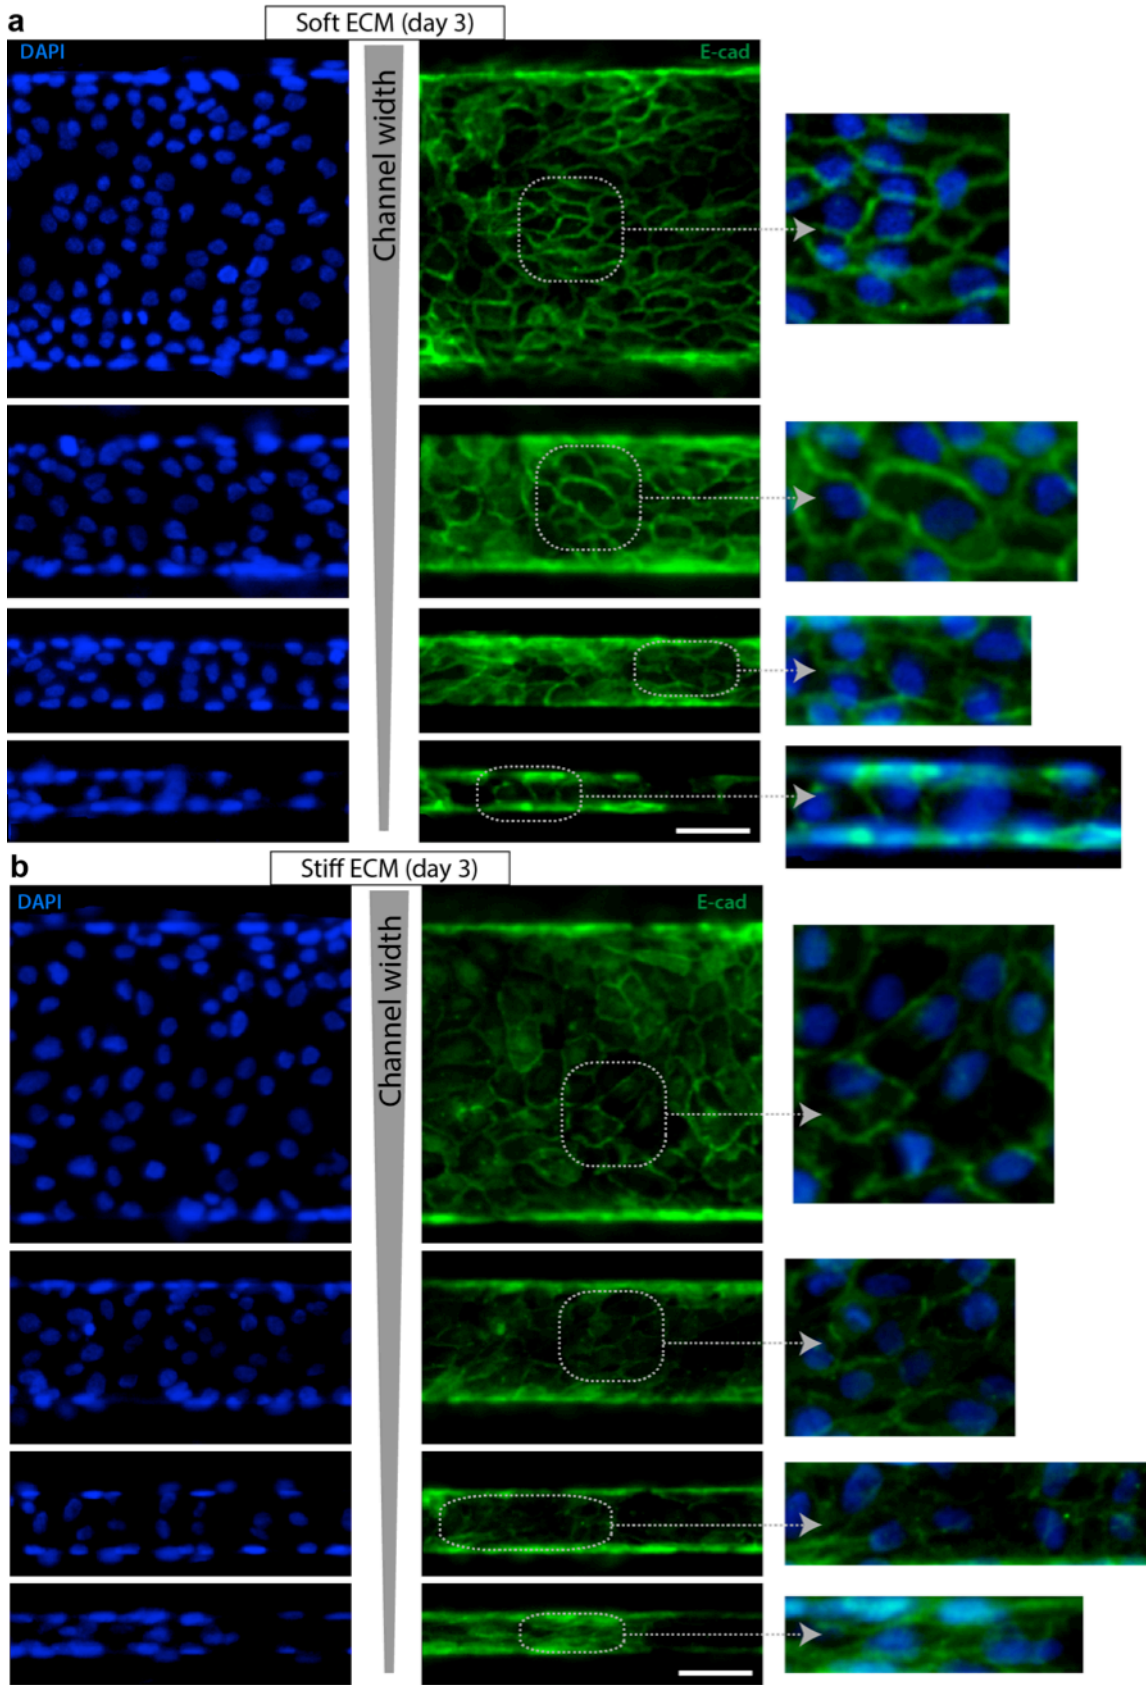

**Supplementary Figure 3: Split images of E-cad and DAPI distributions after day 3.** Immunofluorescence images of E-cad and DAPI distributions, corresponding to the merged images in Fig. 2, after 3 days of culture inside channels made of (a) soft and (b) stiff PA gels, with channel widths between 20-200  $\mu\text{m}$ . Scale bar = 50  $\mu\text{m}$ .

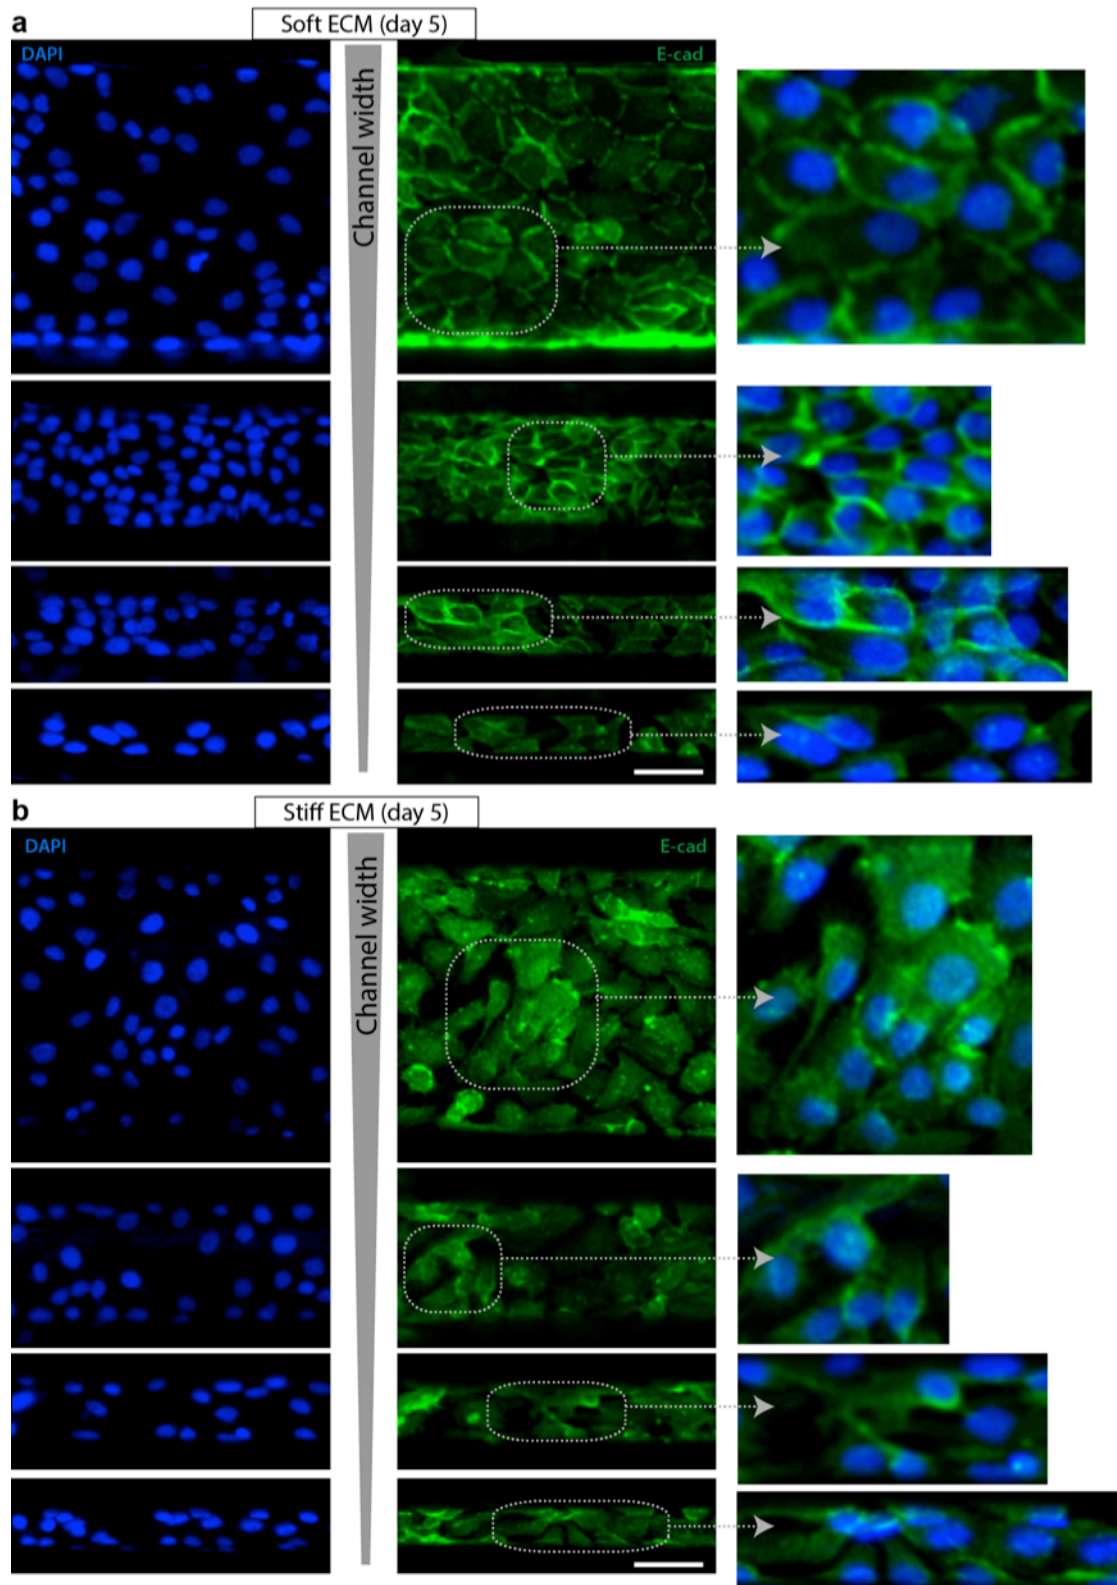

**Supplementary Figure 4: Split images of E-cad and DAPI distributions after day 5.** Immunofluorescence images of E-cad and DAPI distributions, corresponding to the merged images in Fig. 2, after 5 days of culture inside channels made of (a) soft and (b) stiff PA gels, with channel widths between 20-200  $\mu\text{m}$ . Scale bar = 50  $\mu\text{m}$ .



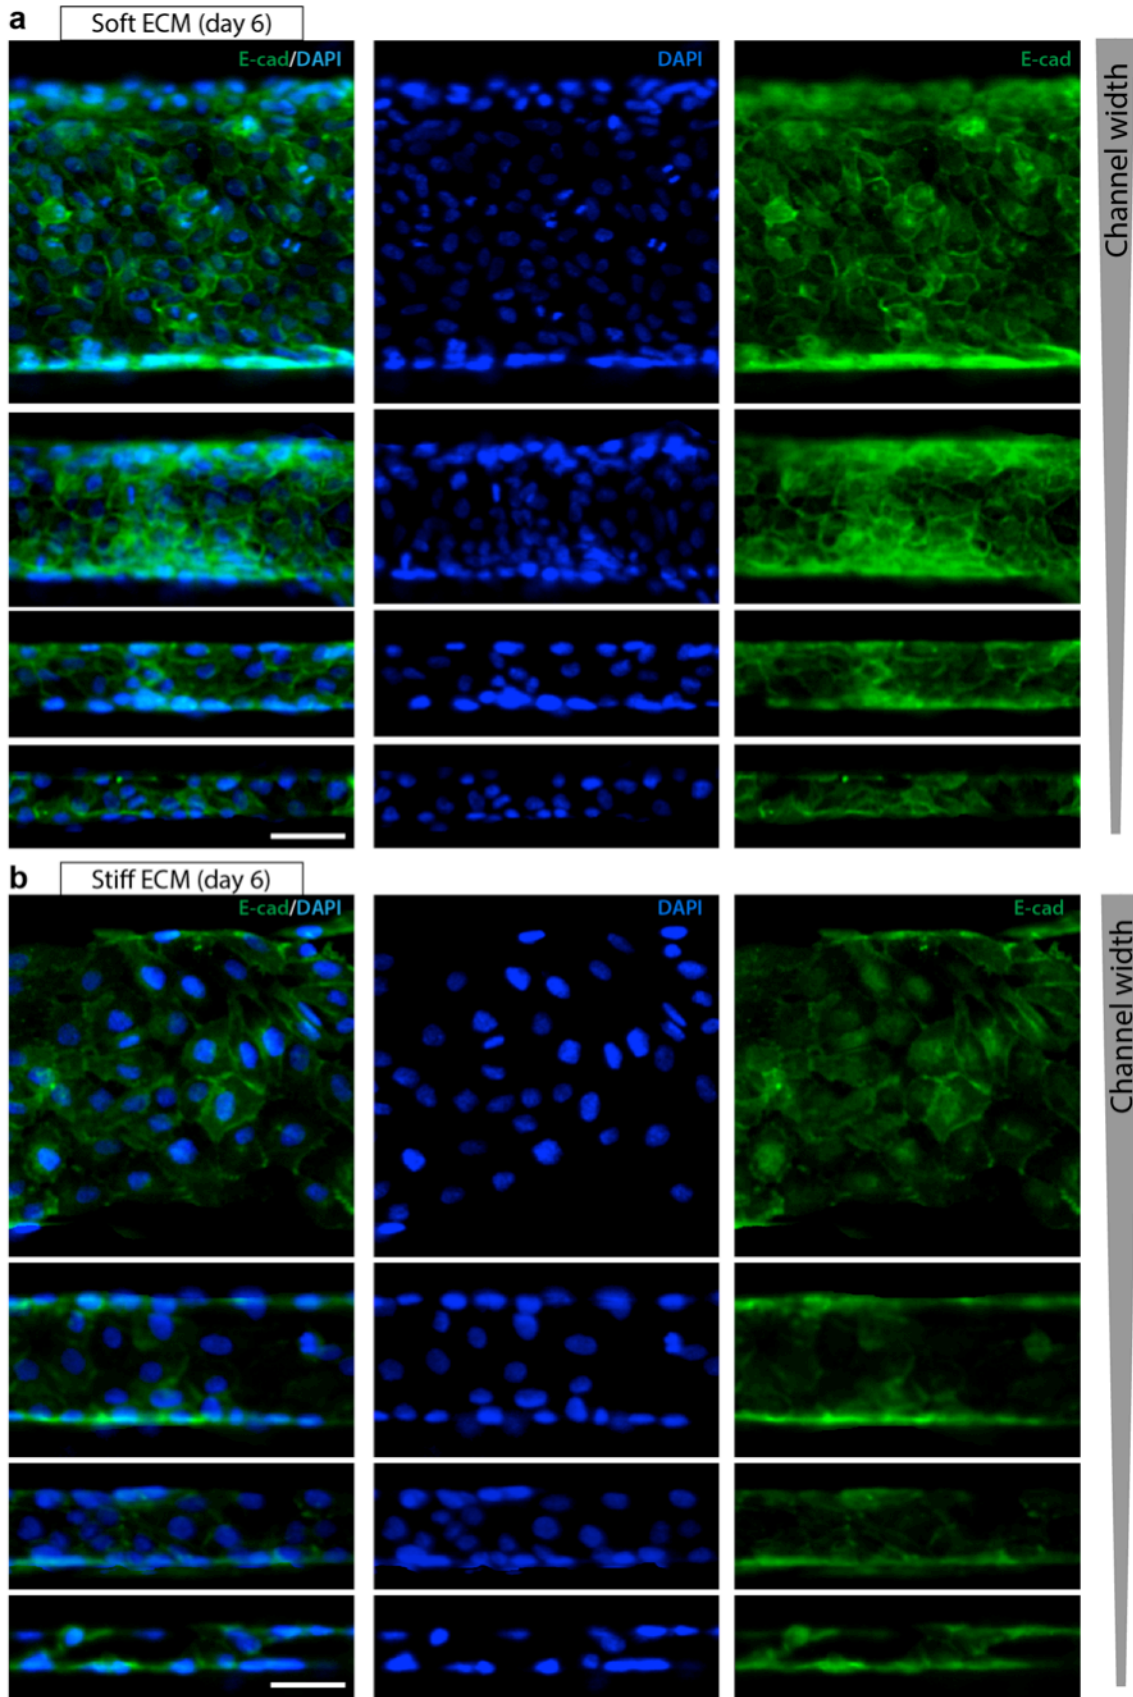

**Supplementary Figure 5: Split and merged images of E-cad and DAPI distributions after day 6.** Immunofluorescence images of E-cad and DAPI distributions, corresponding to the plots in Fig. 2, after 6 days of culture inside channels made of **(a)** soft and **(b)** stiff PA gels, with channel widths between 20-200  $\mu\text{m}$ . Scale bar = 50  $\mu\text{m}$ .

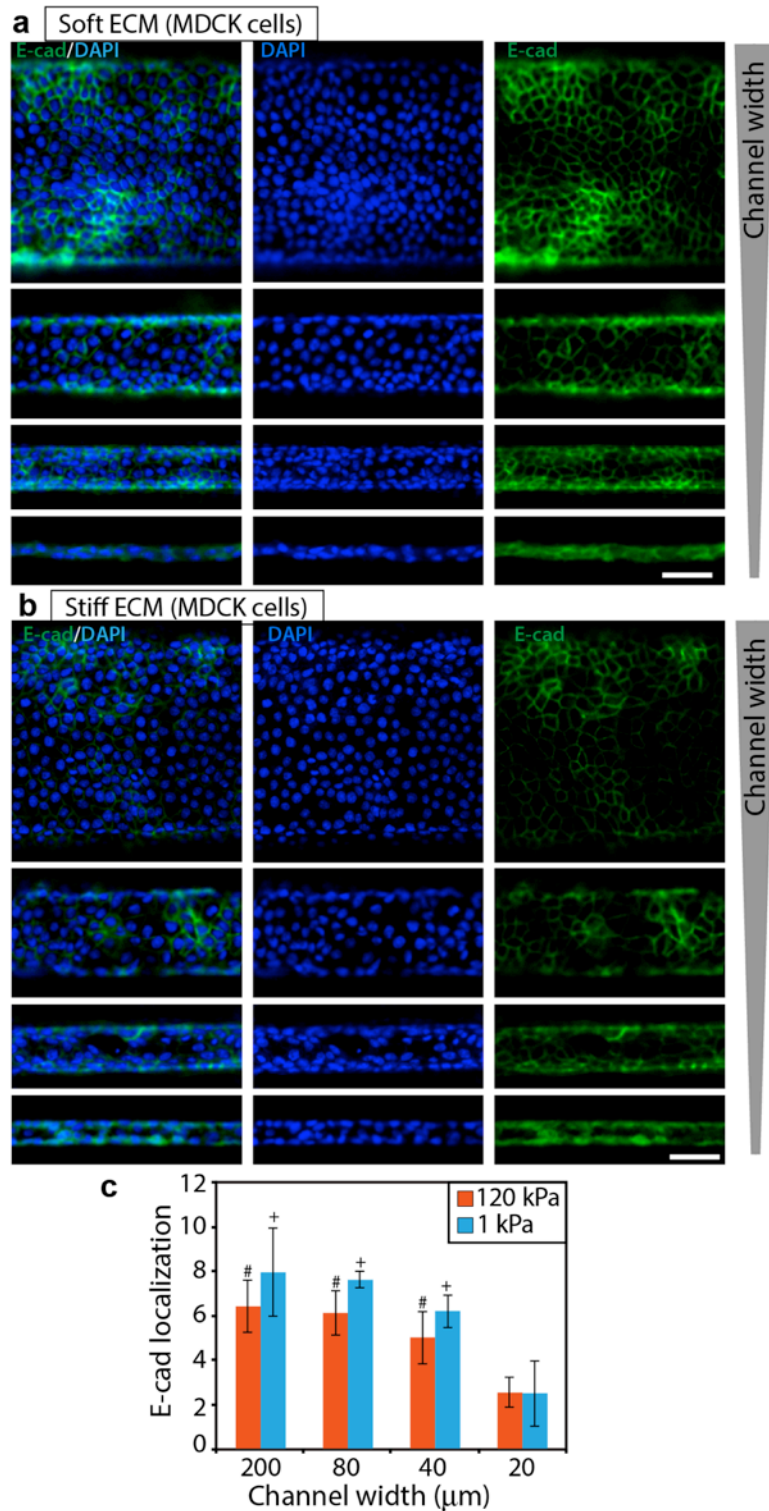

**Supplementary Figure 6: Confinement-sensitive EMT in MDCK cells.** Representative immunofluorescence images of E-cad (green) expression with DAPI (blue) in MDCK cells cultured inside channels made of **(a)** soft and **(b)** stiff PA gels, with widths between 20-200 μm. Scale bar = 50 μm. **(c)** Average fluorescence intensity of membrane localized E-cad in MDCK cells cultured in PA channels of varying width and stiffness. <sup>+</sup> $p < 0.05$  with respect to narrow (20 μm) channels for 1 kPa stiffness. <sup>#</sup> $p < 0.05$  with respect to narrow channels for 120 kPa stiffness. No significant difference between soft and stiff ECMs for any channel width.  $N > 6$  clusters of numerous cells, from at least three experiments (see details in Methods).

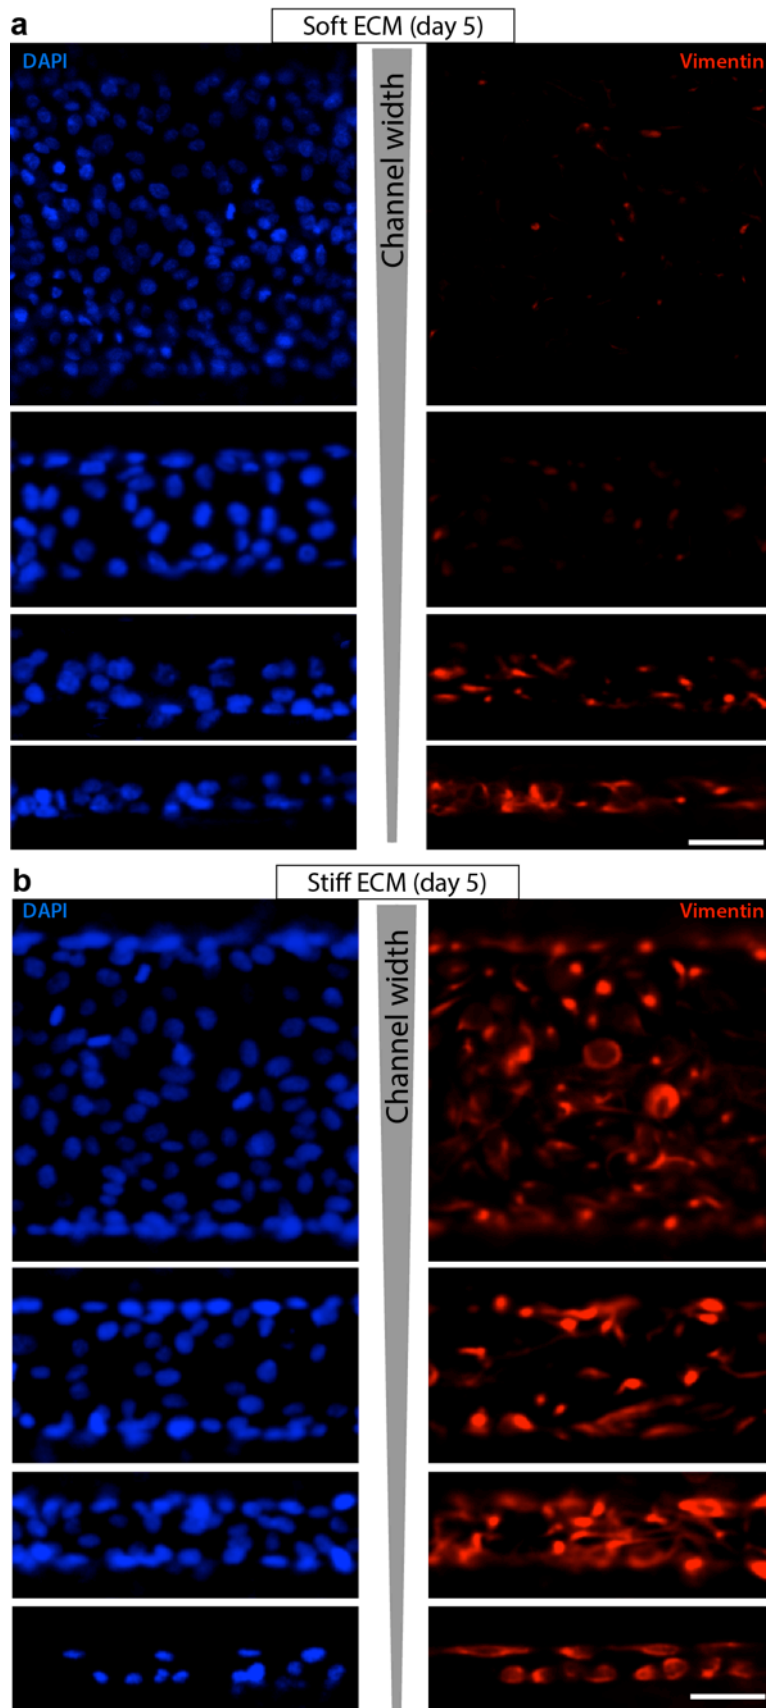

**Supplementary Figure 7: Split images of vimentin and DAPI distributions after day 5.** Immunofluorescence images of vimentin and DAPI distributions, corresponding to the merged images in Fig. 3, after 5 days of culture inside channels made of **(a)** soft and **(b)** stiff PA gels, with channel widths between 20-200  $\mu\text{m}$ . Scale bar = 50  $\mu\text{m}$ .

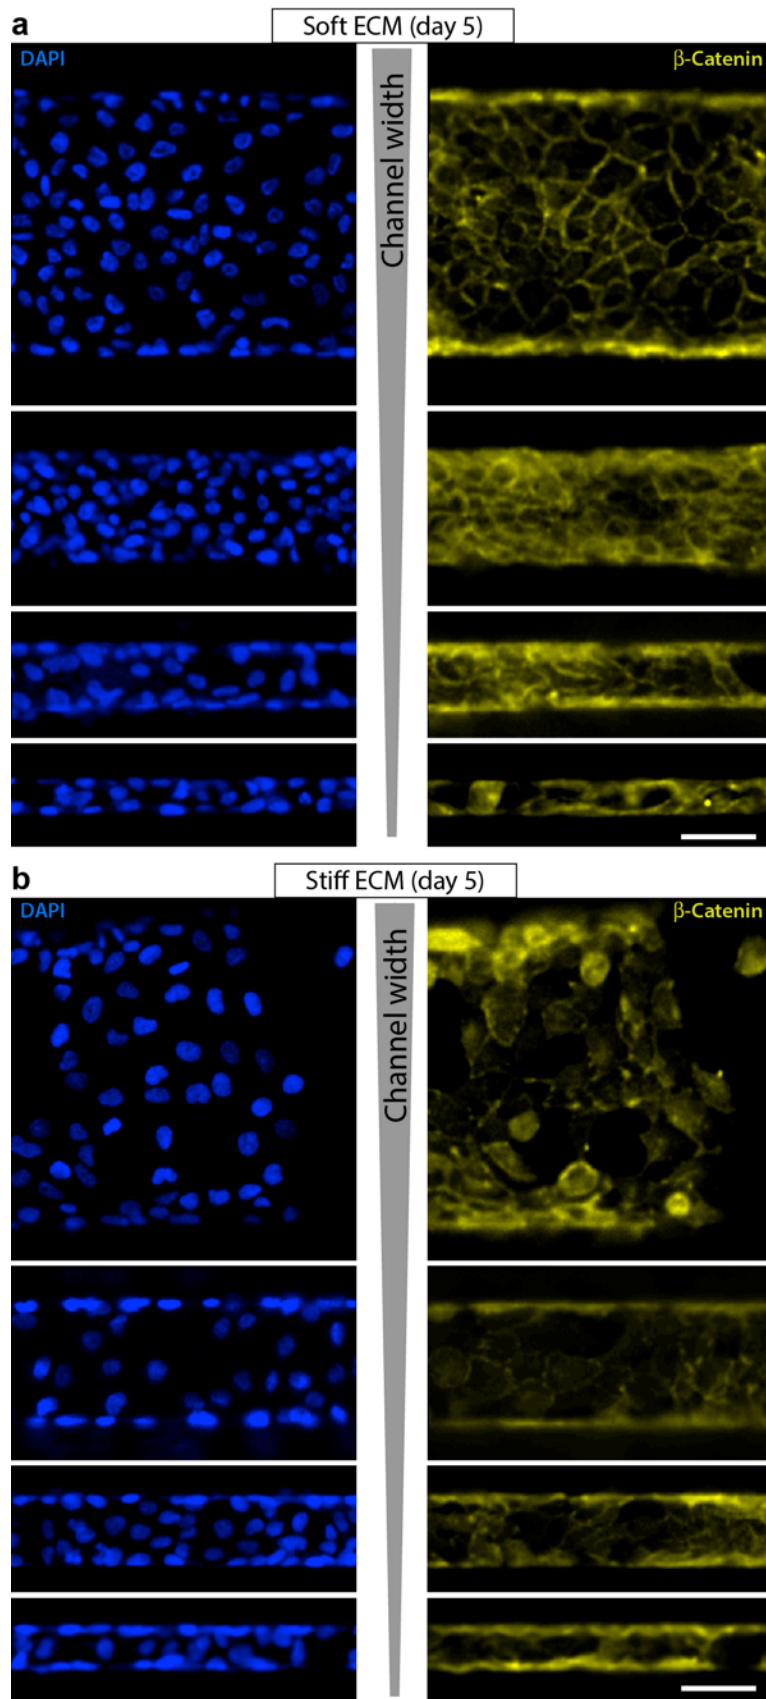

**Supplementary Figure 8: Split images of  $\beta$ -catenin and DAPI distributions after day 5.** Immunofluorescence images of  $\beta$ -catenin and DAPI distributions, corresponding to the merged images in Fig. 3, after 5 days of culture inside channels made of **(a)** soft and **(b)** stiff PA gels, with channel widths between 20-200  $\mu\text{m}$ . Scale bar = 50  $\mu\text{m}$ .



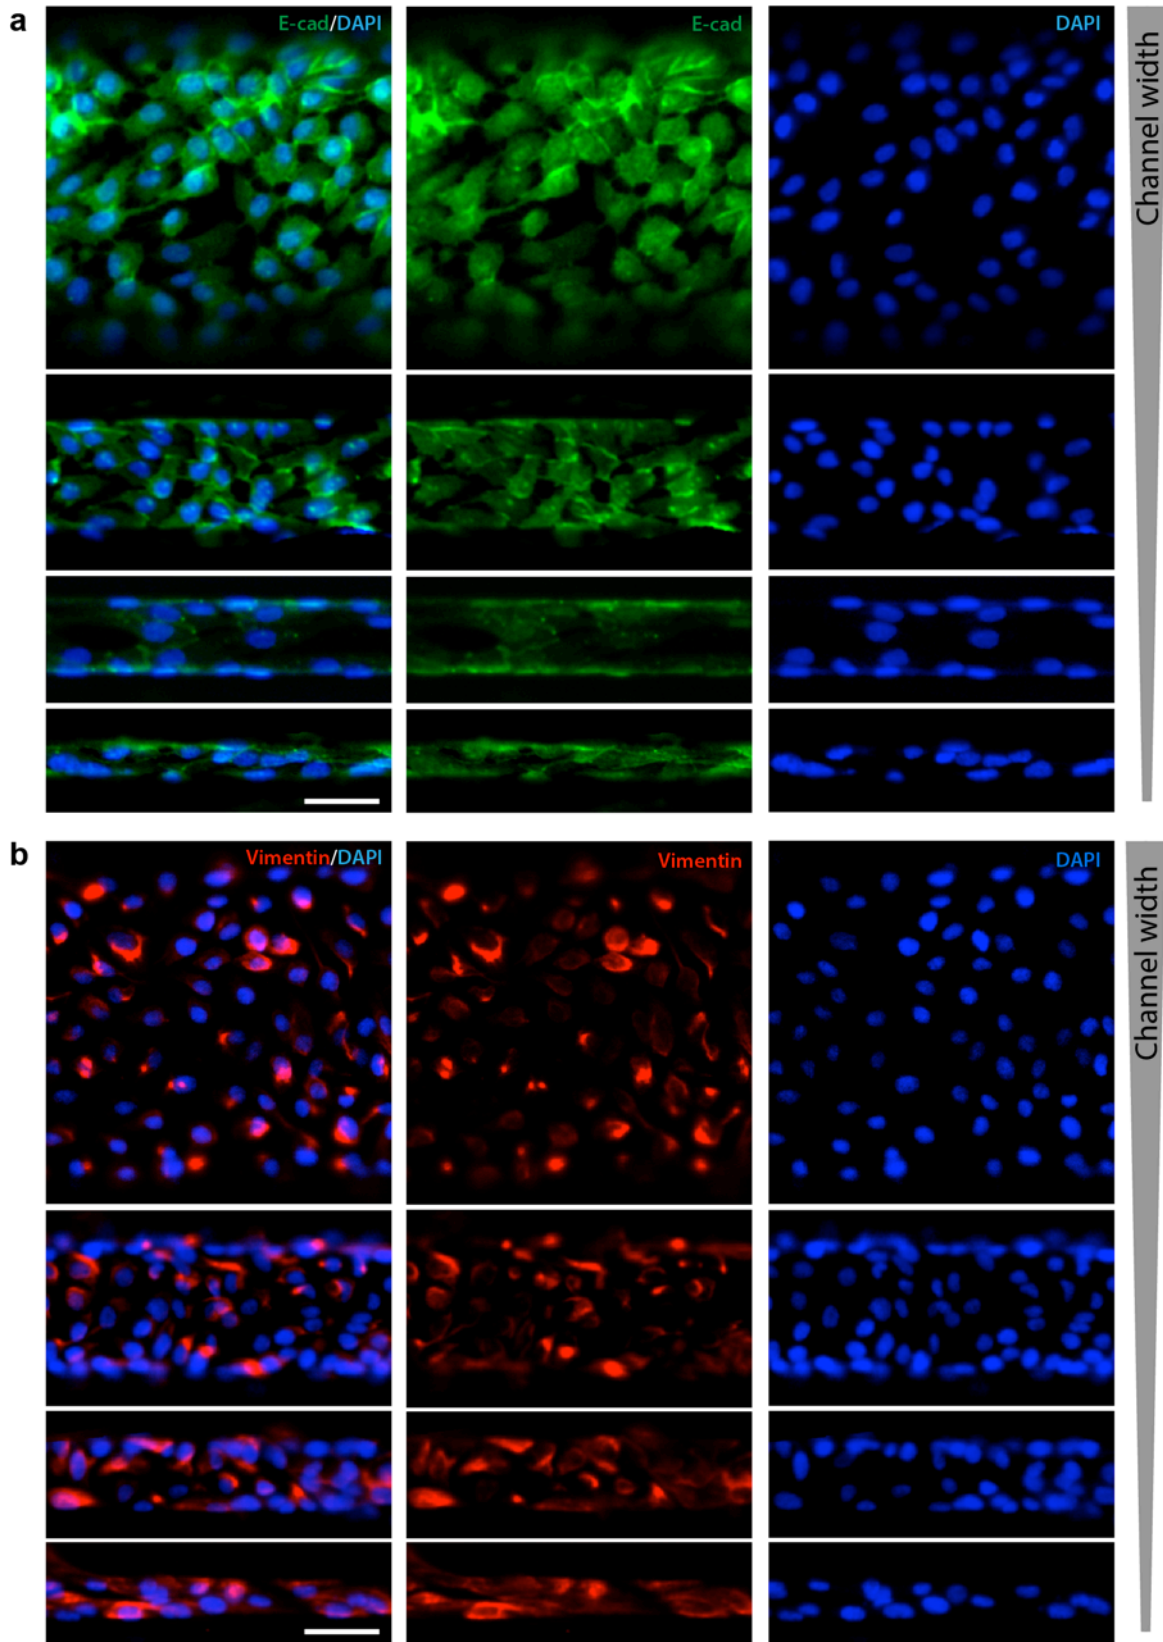

**Supplementary Figure 9: E-cad, vimentin and DAPI distributions for ECM stiffness of 20 kPa.** Immunofluorescence images of DAPI, (a) E-cad, and (b) vimentin distributions after 5 days of culture inside channels made of PA gels of 20 kPa stiffness, with channel widths between 20-200  $\mu\text{m}$ . Scale bar = 50  $\mu\text{m}$ .

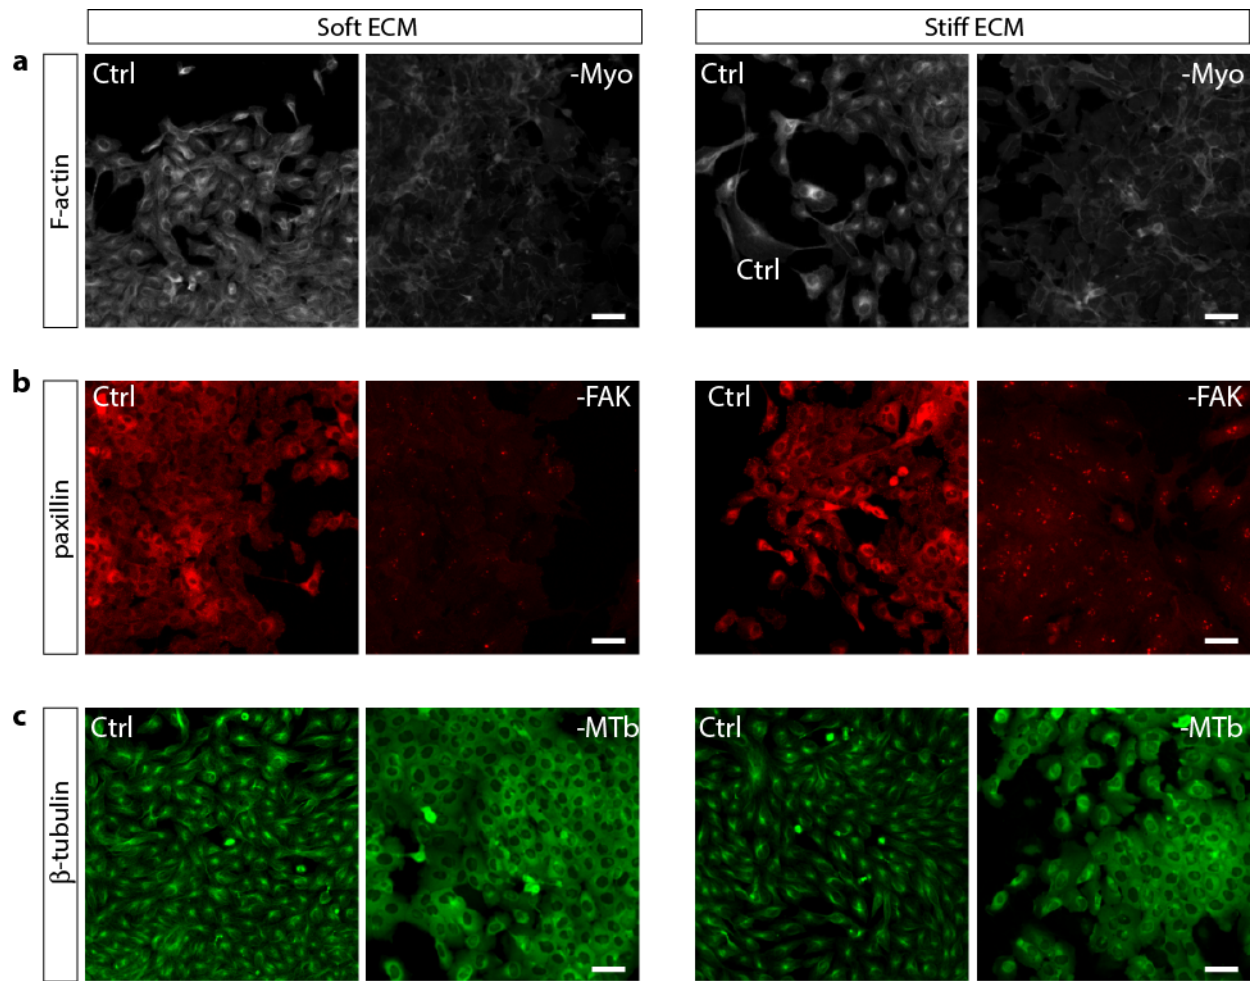

**Supplementary Figure 10: Effects of myosin, microtubule, or FAK inhibition.** Immunofluorescence images of (a) F-actin for control and myosin-inhibited cells, (b) paxillin for control and FAK-inhibited cell, and (c)  $\beta$ -tubulin for control and microtubule-inhibited cells seeded on soft (1 kPa) and stiff (120 kPa) PA gel substrates. Scale bar = 50  $\mu$ m.

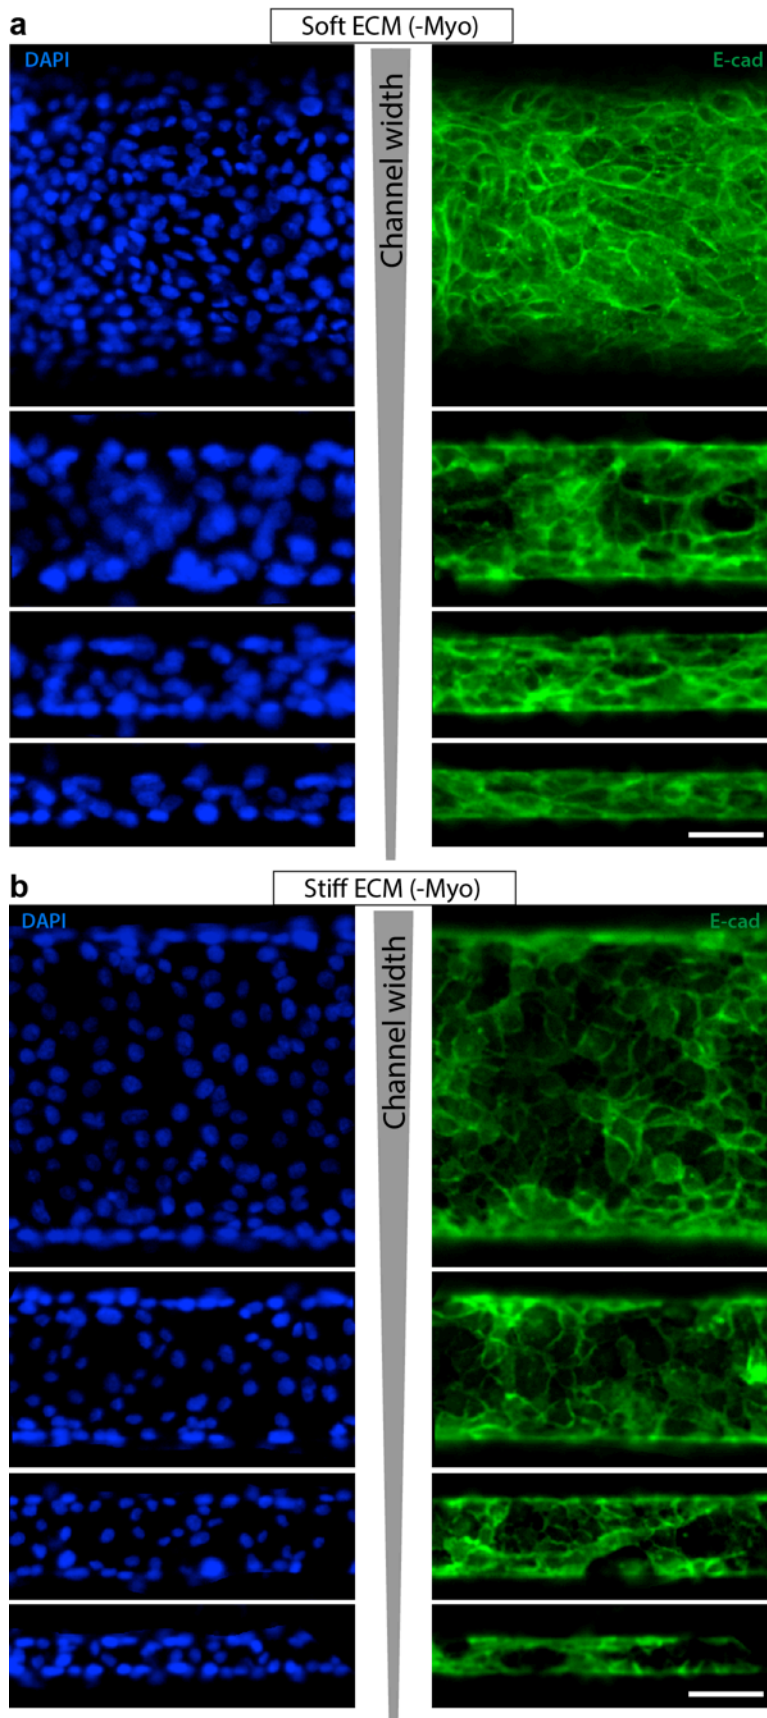

**Supplementary Figure 11: Split E-cad and DAPI images after myosin inhibition.** Immunofluorescence images of E-cad and DAPI distributions, corresponding to the merged images in Fig. 4, after myosin inhibition inside channels made of **(a)** soft and **(b)** stiff PA gels, with channel widths between 20-200  $\mu\text{m}$ . Scale bar = 50  $\mu\text{m}$ .

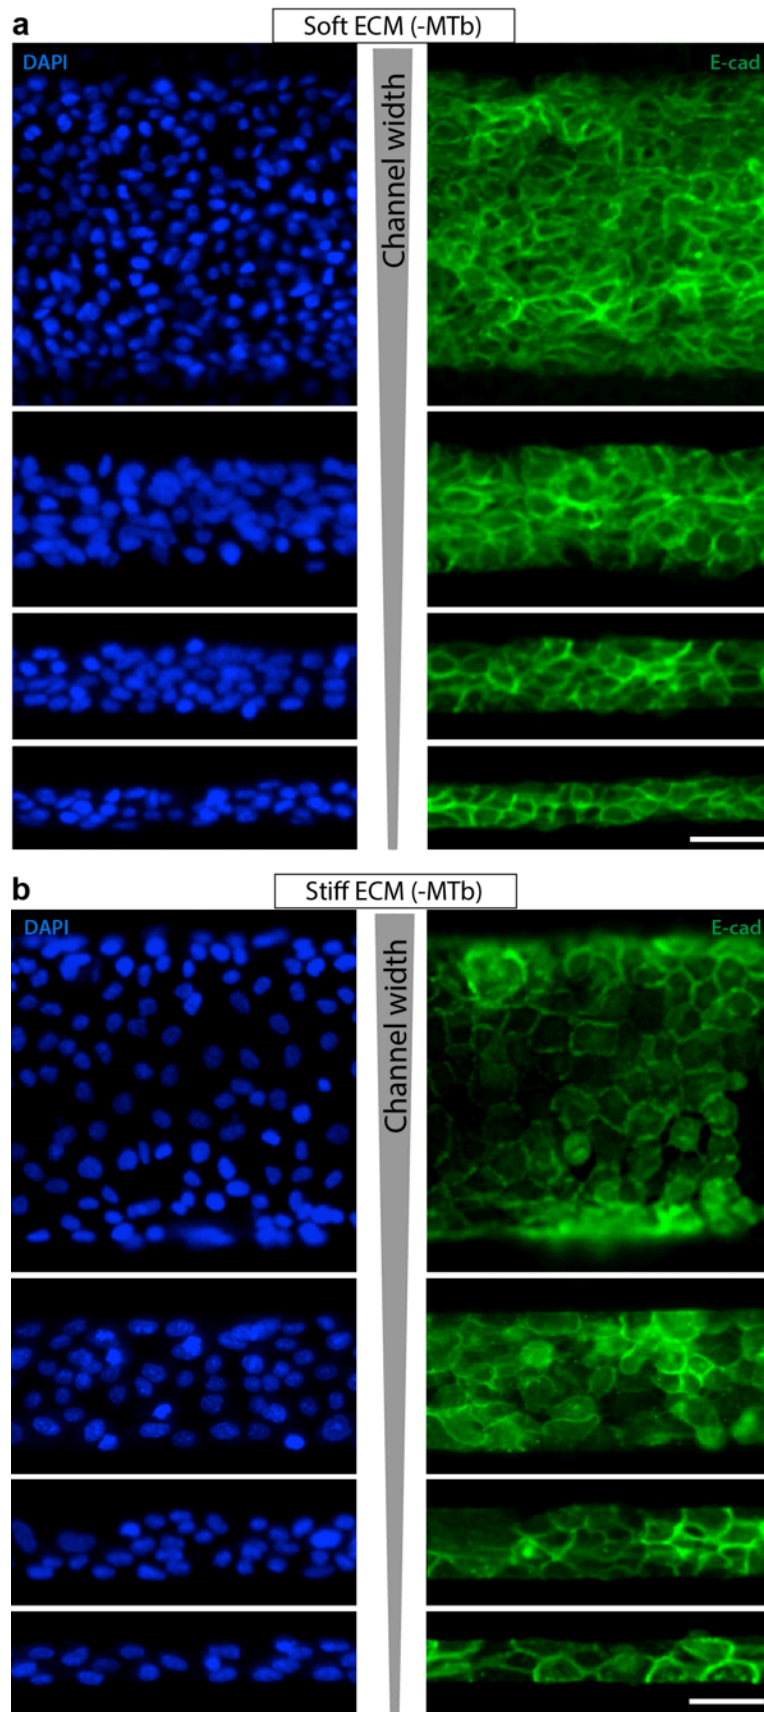

**Supplementary Figure 12: Split E-cad and DAPI images after microtubule inhibition.** Immunofluorescence images of E-cad and DAPI distributions, corresponding to the merged images in Fig. 4, after microtubule inhibition inside channels made of (a) soft and (b) stiff PA gels, with channel widths between 20-200  $\mu\text{m}$ . Scale bar = 50  $\mu\text{m}$ .



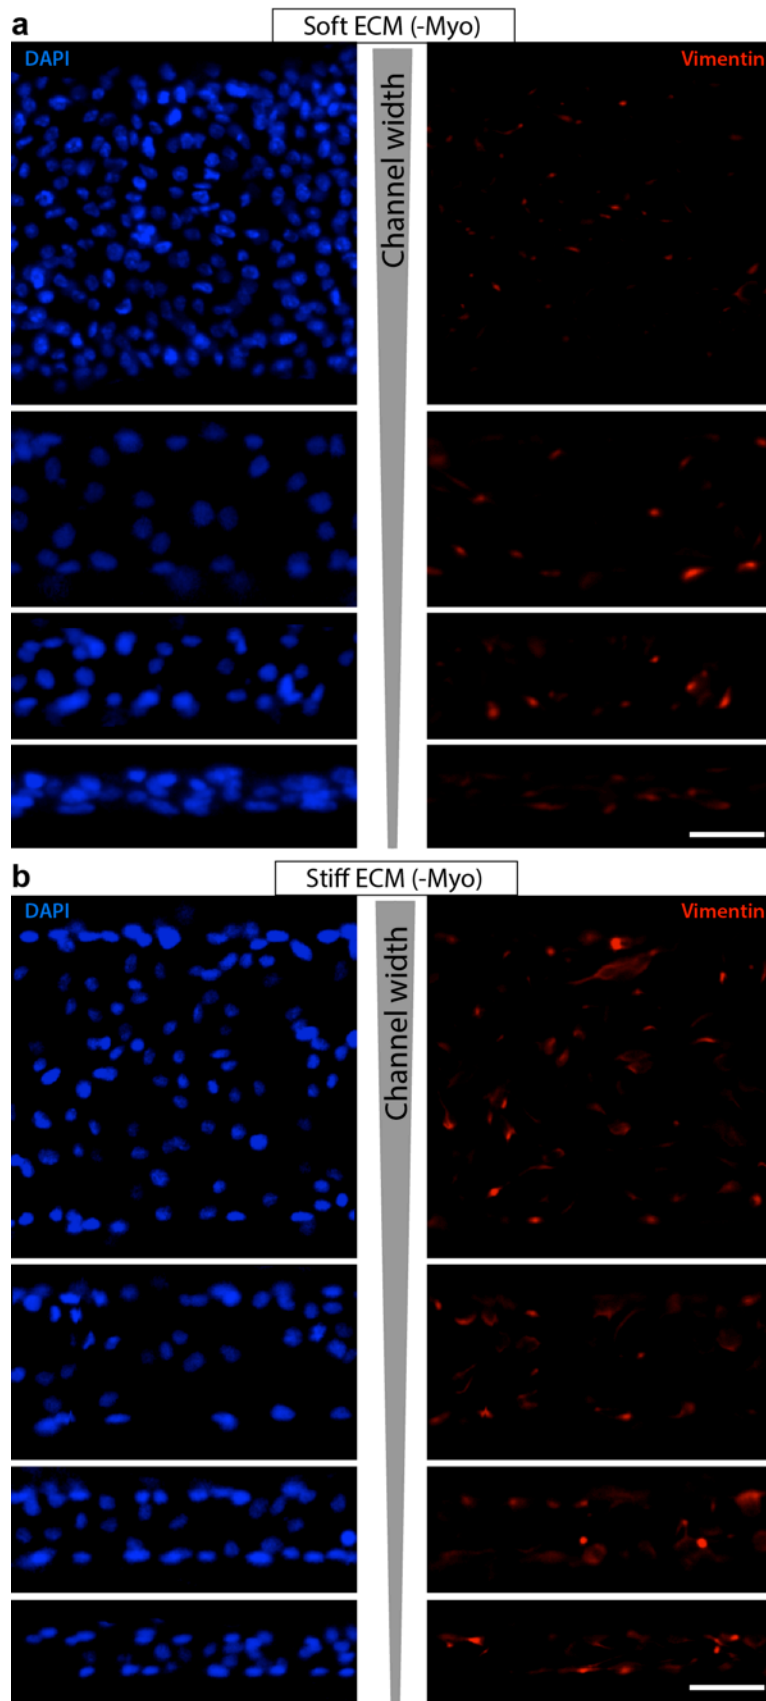

**Supplementary Figure 13: Split vimentin and DAPI images after myosin inhibition.** Immunofluorescence images of vimentin and DAPI distributions, corresponding to the merged images in Fig. 5, after myosin inhibition inside channels made of **(a)** soft and **(b)** stiff PA gels, with channel widths between 20-200  $\mu\text{m}$ . Scale bar = 50  $\mu\text{m}$ .

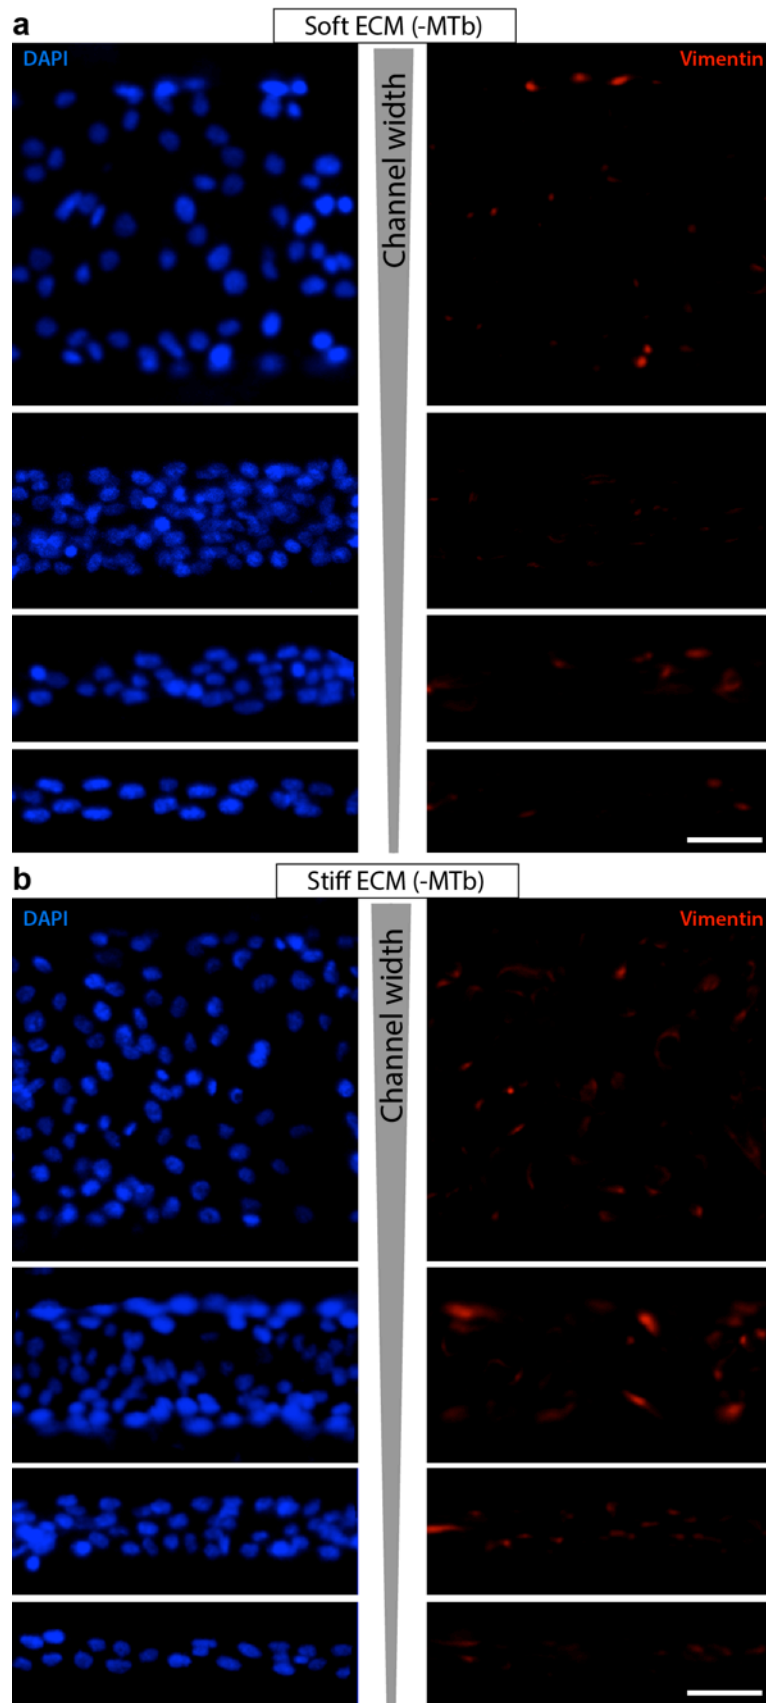

**Supplementary Figure 14: Split vimentin and DAPI images after microtubule inhibition.** Immunofluorescence images of vimentin and DAPI distributions, corresponding to the merged images in Fig. 5, after microtubule inhibition inside channels made of **(a)** soft and **(b)** stiff PA gels, with channel widths between 20-200  $\mu\text{m}$ . Scale bar = 50  $\mu\text{m}$ .

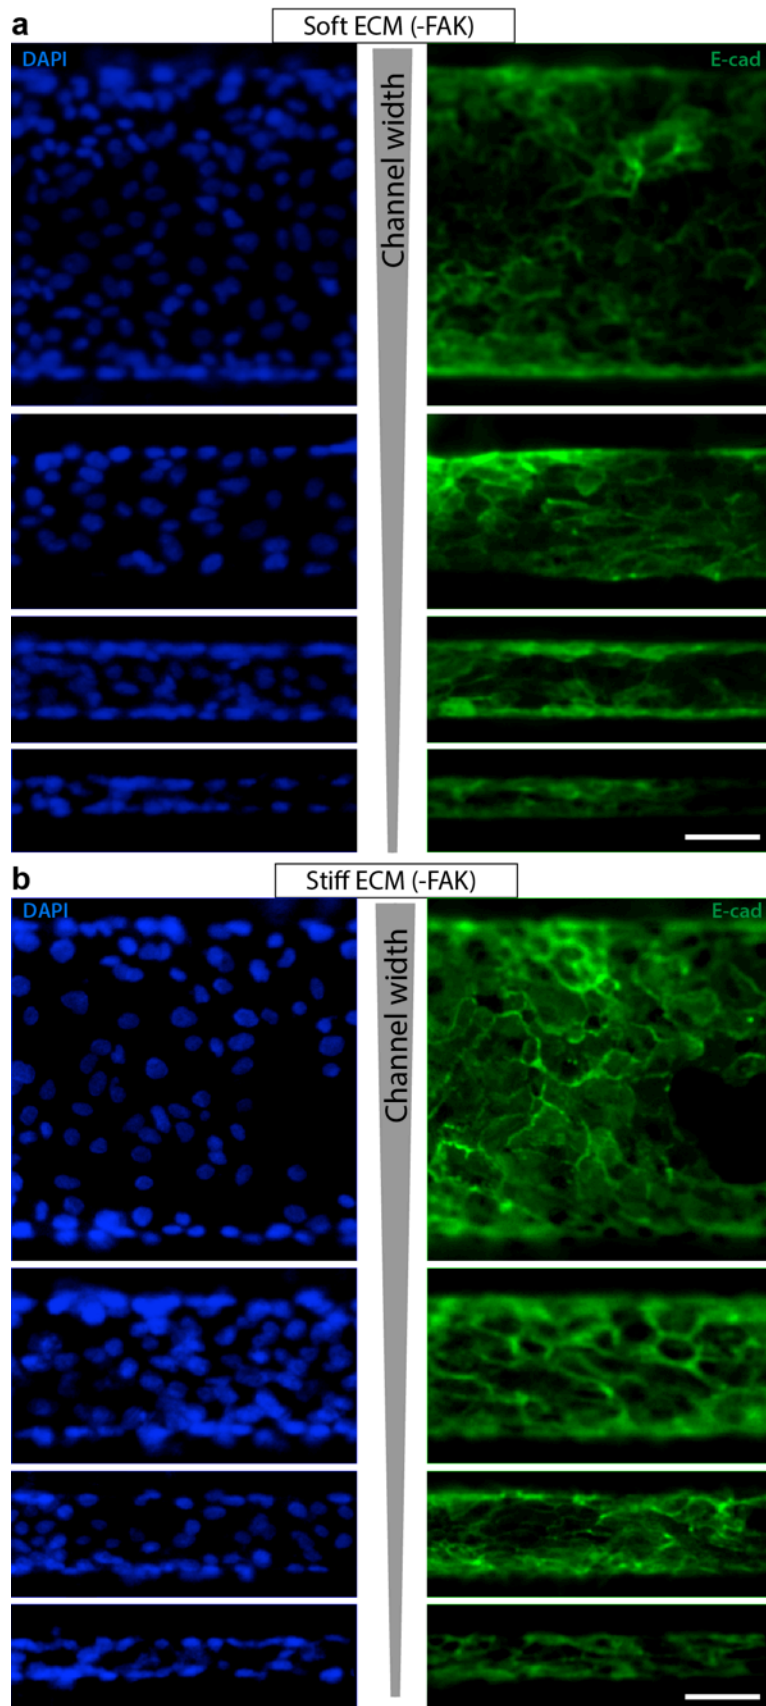

**Supplementary Figure 15: Split E-cad and DAPI images after FAK inhibition.** Immunofluorescence images of E-cad and DAPI distributions, corresponding to the merged images in Fig. 6, after FAK inhibition inside channels made of **(a)** soft and **(b)** stiff PA gels, with channel widths between 20-200  $\mu\text{m}$ . Scale bar = 50  $\mu\text{m}$ .

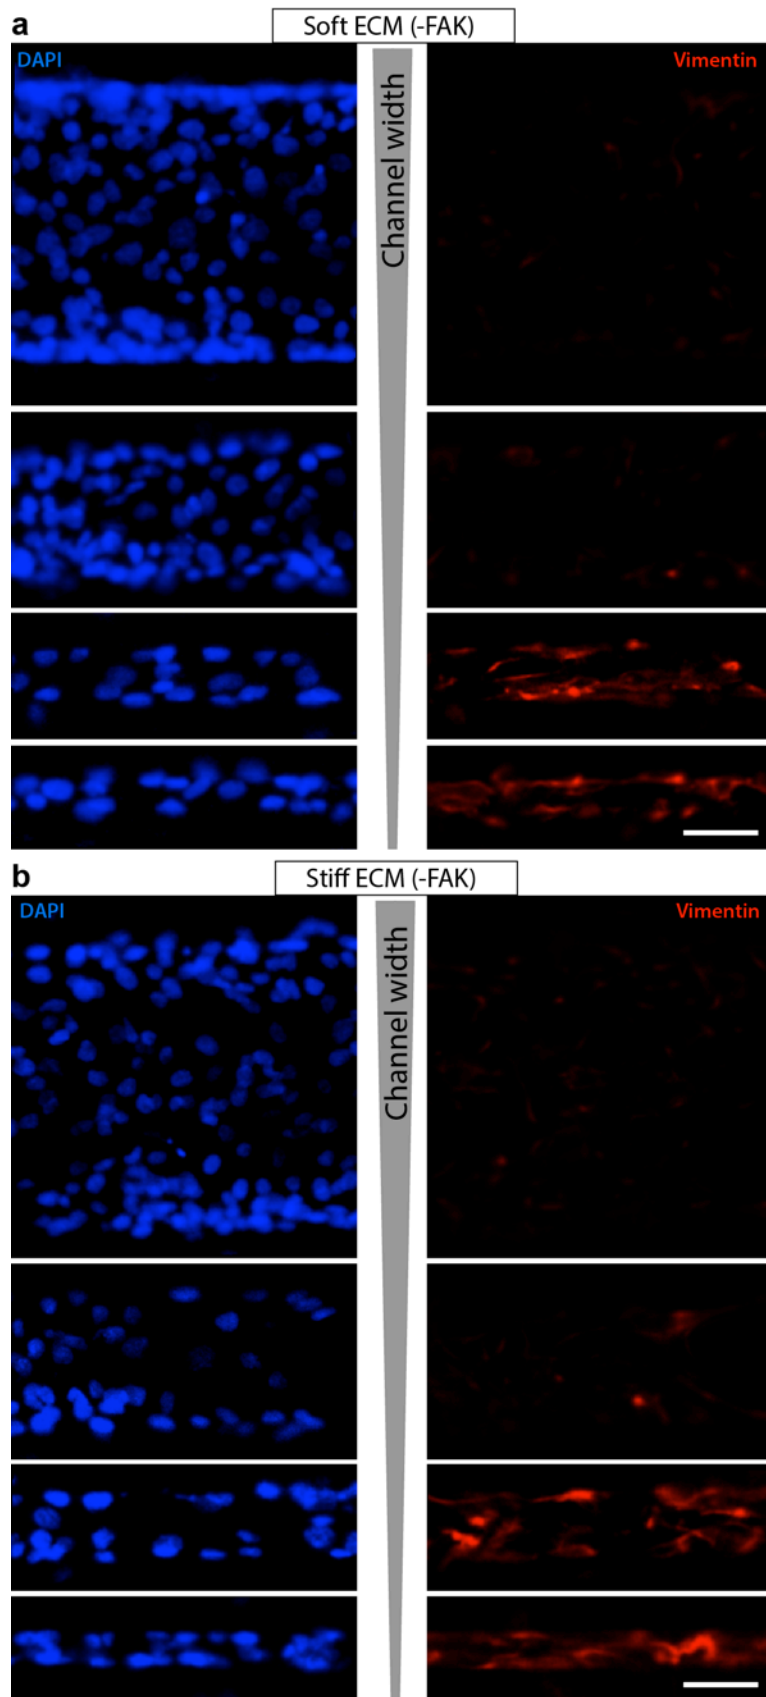

**Supplementary Figure 16: Split vimentin and DAPI images after FAK inhibition.** Immunofluorescence images of vimentin and DAPI distributions, corresponding to the merged images in Fig. 6, after FAK inhibition inside channels made of **(a)** soft and **(b)** stiff PA gels, with channel widths between 20-200  $\mu\text{m}$ . Scale bar = 50  $\mu\text{m}$ .
